# Supplementary material for: A truncated octahedron NaCe(MoO4)2 nanostructure: a potential material for blue emission and acetone sensing
Source: Royal Society of Chemistry journal article supplement (doi:10.1039/d4ma00306c), 2024-01-01
Supplement: d4ma00306c1.pdf [file d4ma00306c1.pdf]

Electronic Supplementary Information

**Truncated octahedra NaCe(MoO<sub>4</sub>)<sub>2</sub> nanostructure: a potential material for blue emission and acetone sensing**

Nibedita Haldar,<sup>(a)#</sup> Tanmoy Mondal<sup>(a)</sup>, Tanushri Das<sup>(a, b)</sup>, Debabrata Sarkar<sup>(c)</sup>, Mrinal Pal<sup>(b)</sup>,  
Asiful H. Seikh<sup>(d)</sup> and Chandan Kumar Ghosh<sup>(a)\*</sup>

<sup>(a)</sup>School of Materials Science and Nanotechnology, Jadavpur University, Jadavpur, Kolkata – 700032, India

<sup>(b)</sup>CSIR-Central Glass and Ceramic Research Institute, Kolkata – 700032

<sup>(c)</sup>Applied NanoPhysics Laboratory, Department of Physics and Nanotechnology, SRM Institute of Science and Technology, Kattankulathur – 603203, India

<sup>(d)</sup>Mechanical Engineering Department, College of Engineering, King Saud University, Riyadh, 11421, Saudi Arabia

# At present: University of Engineering and Management, New Town, Kolkata - 700160

\*Corresponding author's email ID: [chandan.kghosh@jadavpuruniversity.in](mailto:chandan.kghosh@jadavpuruniversity.in), Tel: 033-2457-3028

Table S1 Refined structural parameters and the reliability factors from the Rietveld fitting of NCMO samples.

| Properties                        |               | <i>NCMO</i> <sub>0.00</sub> | <i>NCMO</i> <sub>0.50</sub> | <i>NCMO</i> <sub>0.78</sub> | <i>NCMO</i> <sub>1.00</sub> |
|-----------------------------------|---------------|-----------------------------|-----------------------------|-----------------------------|-----------------------------|
| Lattice parameter ( $\text{Å}$ )  | a=b           | 5.412(8)                    | 5.404(2)                    | 5.404(2)                    | 5.398(9)                    |
|                                   | c             | 11.569(2)                   | 11.487(5)                   | 11.478(5)                   | 11.440(4)                   |
| Unit cell volume ( $\text{Å}^3$ ) |               | 338.931(1)                  | 335.755(3)                  | 335.209(2)                  | 333.518(2)                  |
| Bond length ( $\text{Å}$ )        | Na/Ce-O       | 2.514(3)                    | 2.497(4)                    | 2.467(8)                    | 2.448(4)                    |
|                                   |               | 2.374(8)                    | 2.306(2)                    | 2.276(2)                    | 2.257(8)                    |
|                                   | Mo-O          | 1.772(1)                    | 1.784(5)                    | 1.786(5)                    | 1.789(5)                    |
| Bond angle (in degree)            | Na/Ce-O-Na/Ce | 102.842(4)                  | 102.033(10)                 | 101.996(9)                  | 102.008(9)                  |
|                                   | Na/Ce-O-Mo    | 133.820(3)                  | 133.244(7)                  | 133.238(7)                  | 133.226(6)                  |
|                                   | O-Mo-O        | 107.397(4)                  | 106.587(10)                 | 106.550(9)                  | 106.532(9)                  |
| Crystallite size (nm)             |               | 71.20                       | 92.00                       | 107.70                      | 91.40                       |
| $R_p$ (%)                         |               | 14.10                       | 12.10                       | 16.20                       | 15.00                       |
| $R_{wp}$ (%)                      |               | 18.80                       | 18.20                       | 17.60                       | 18.40                       |
| $R_{exp}$ (%)                     |               | 8.77                        | 14.60                       | 13.40                       | 10.80                       |
| $\chi^2$                          |               | 3.57                        | 2.29                        | 3.53                        | 3.29                        |

Table S2 Calculated energy (from DFT) for Acetone adsorption of NCMO samples.

| System                   | $E_{\text{NCMO} + \text{acetone}}$<br>(eV) | $E_{\text{NCMO}}$<br>(eV) | $E_{\text{acetone}}$<br>(eV) | $E_{\text{ads}}$ (eV) | No of atom<br>(NCMO +<br>acetone) | $E_{\text{ads}}$<br>(eV)/atom |
|--------------------------|--------------------------------------------|---------------------------|------------------------------|-----------------------|-----------------------------------|-------------------------------|
| NCMO                     | -195.666                                   | -97.069                   | 67.592                       | -166.189              | 33                                | -5.030                        |
| NCMO –<br>$V_0^\bullet$  | -186.202                                   | -87.194                   | 67.592                       | -166.600              | 32                                | -5.206                        |
| NCMO –<br>$2V_0^\bullet$ | -196.614                                   | -77.141                   | 67.592                       | -187.065              | 31                                | -6.030                        |

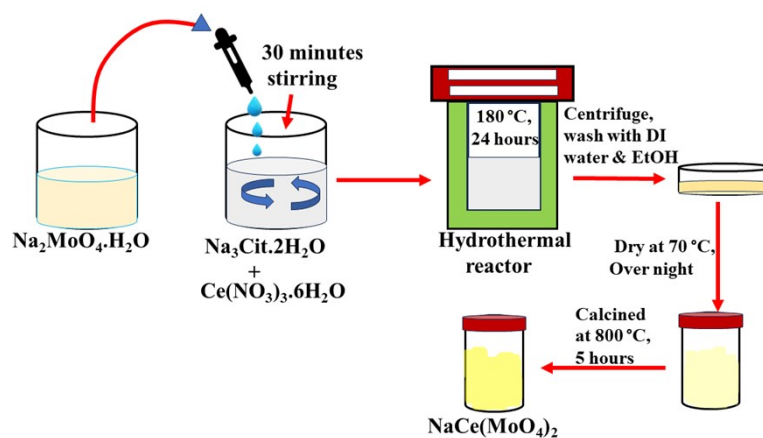

Fig. S1 Schematic representation of reaction procedure.

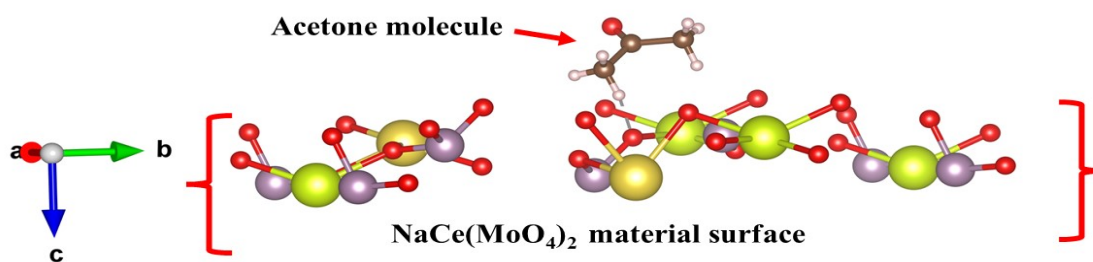

Fig. S2 Atomic structure of acetone molecule adsorption on NCMO (112) surface.

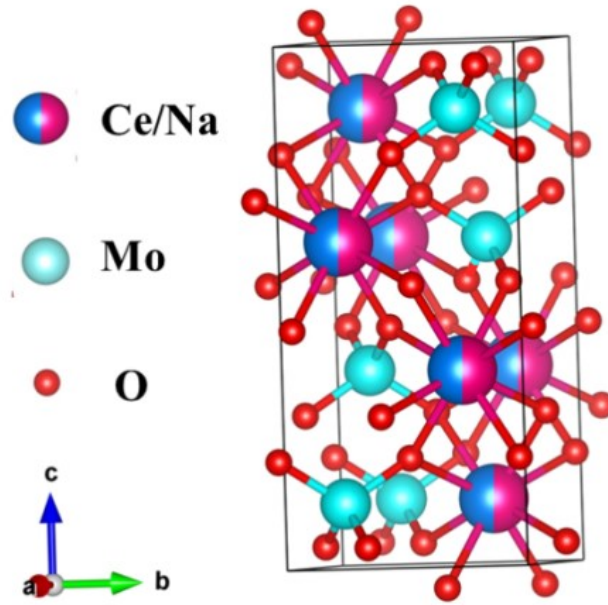

Fig. S3 Structure of the NCMO (Tetragonal) nanostructure.

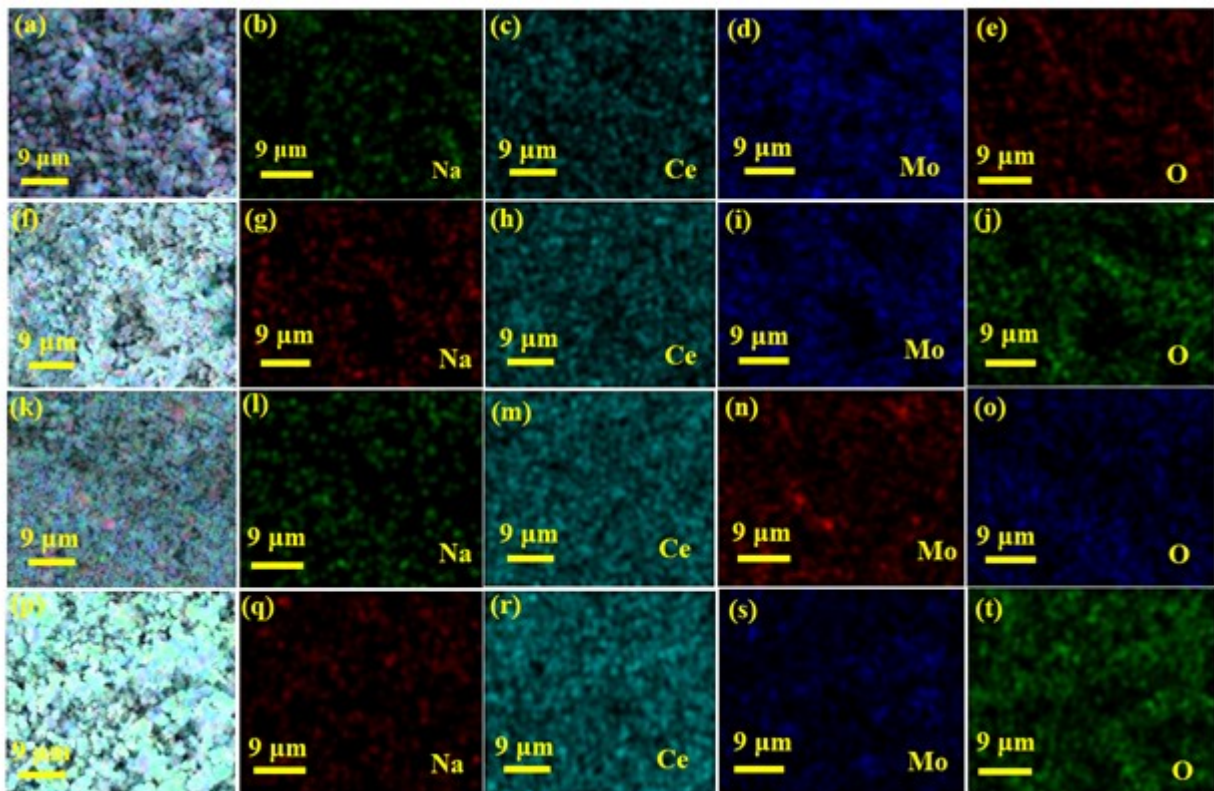

Fig S4 Elemental mapping of  $NCMO_{0.00}$  ((a) – (e)),  $NCMO_{0.50}$  ((f) – (j)),  $NCMO_{0.78}$  ((k) – (o)) and  $NCMO_{1.00}$  ((p) – (t)) respectively.

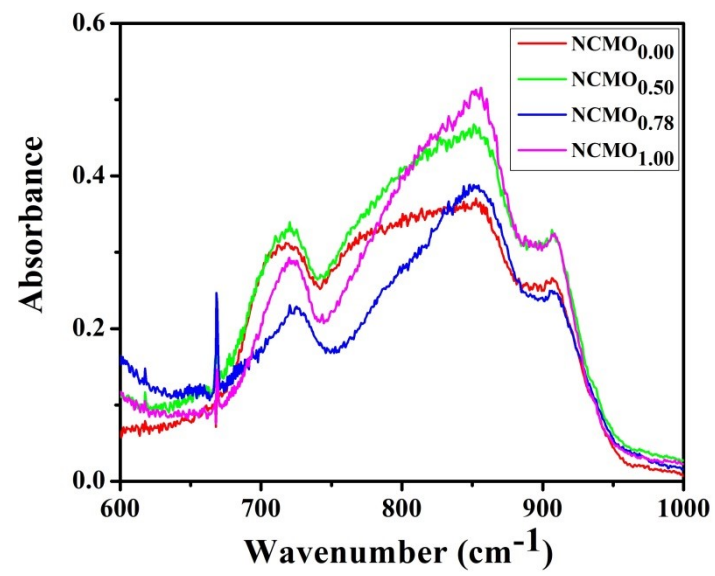

Fig. S5 FTIR spectra of NCMO nanostructures.

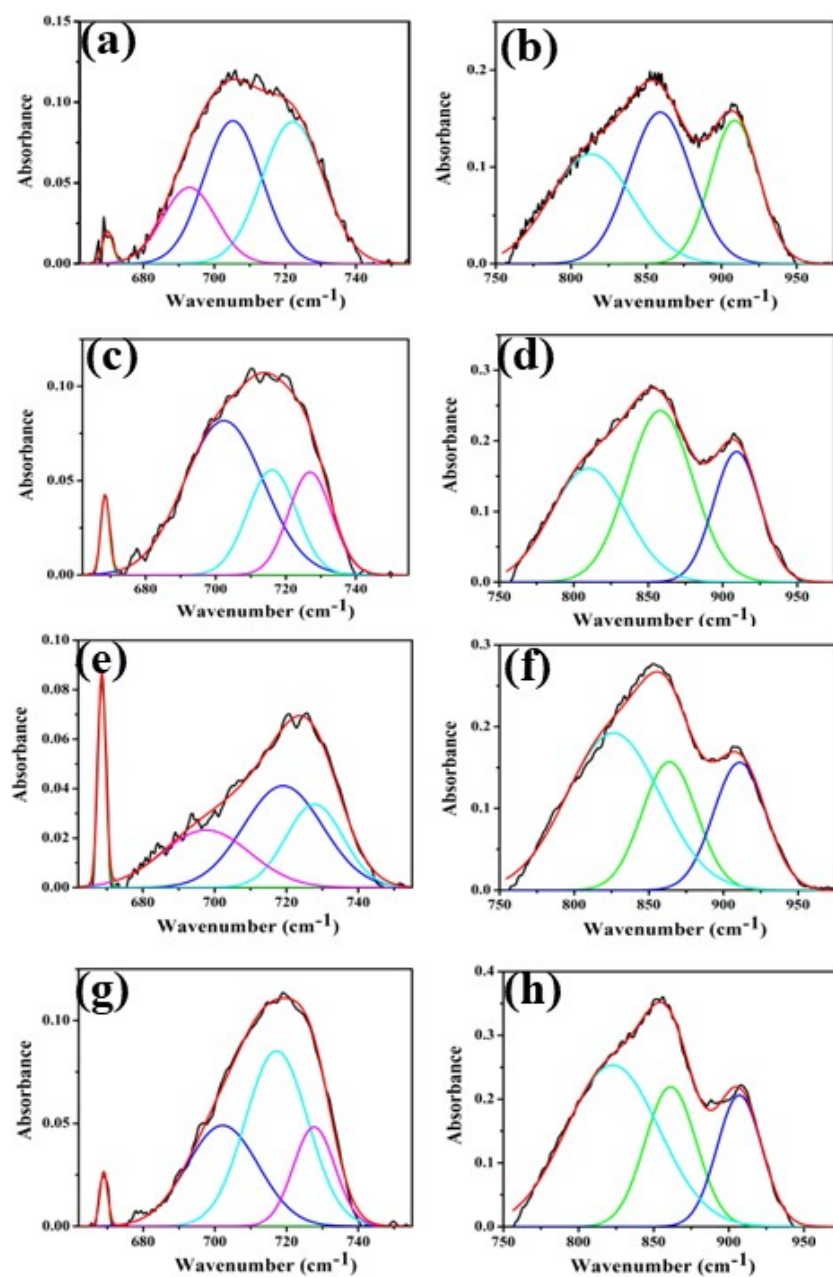

Fig. S6 Deconvoluted FTIR bands 660-750 and 750-960 of  $NCMO_{0.00}$  (a, b),  $NCMO_{0.50}$  (c, d),  $NCMO_{0.78}$  (e, f) and  $NCMO_{1.00}$  (g, h) respectively.

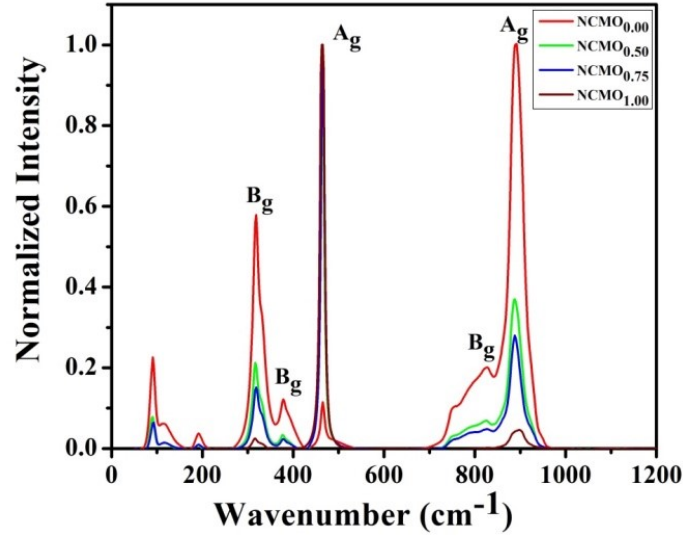

Fig. S7 Raman spectra of NCMO nanostructures.

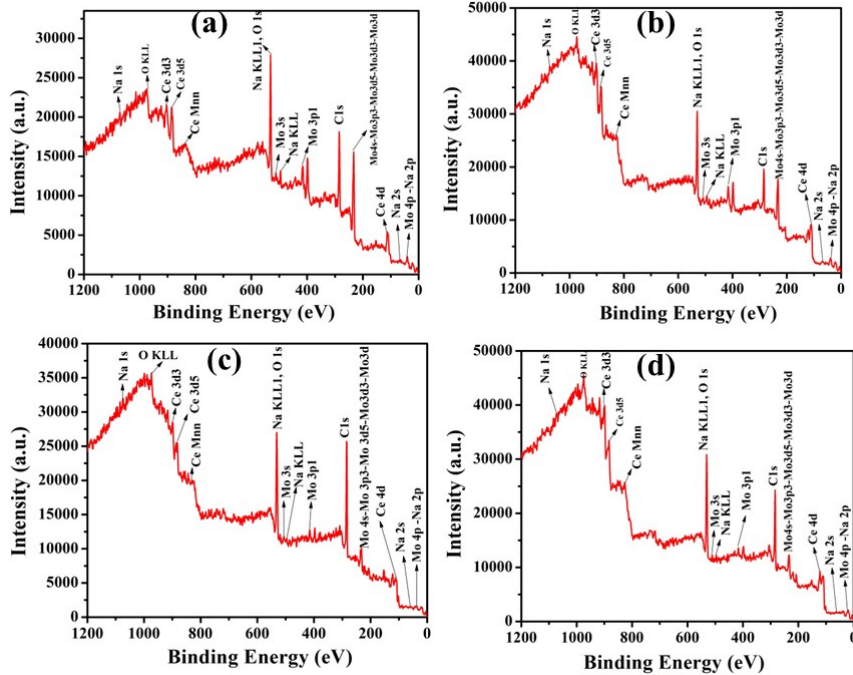

Fig. S8 XPS wide spectrum of Ce-3d, W-4f, O-1s, Na-1s of (a)  $\text{NCMO}_{0.00}$ , (b)  $\text{NCMO}_{0.50}$ , (c)  $\text{NCMO}_{0.75}$  and (d)  $\text{NCMO}_{1.00}$  respectively.

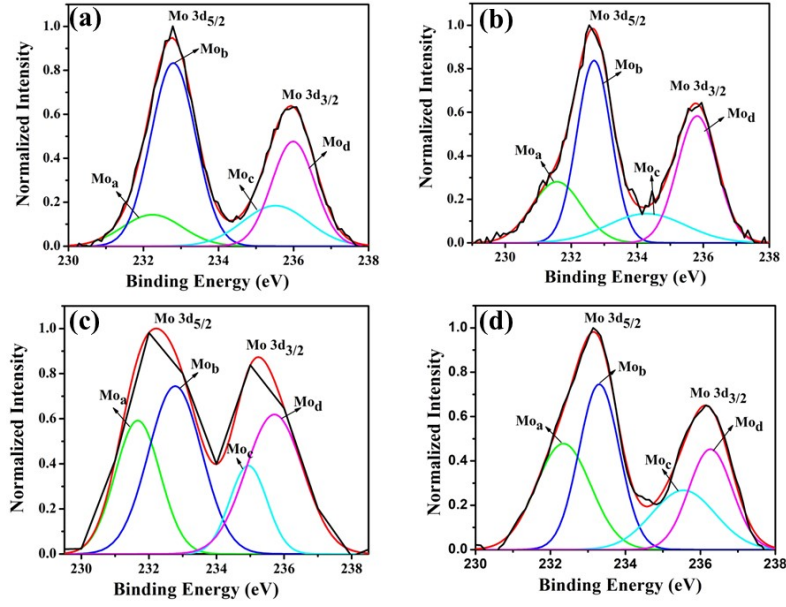

Fig. S9 XPS Mo 3d of (a)  $NCMO_{0.00}$ , (b)  $NCMO_{0.50}$ , (c)  $NCMO_{0.78}$  and (d)  $NCMO_{1.00}$  respectively.

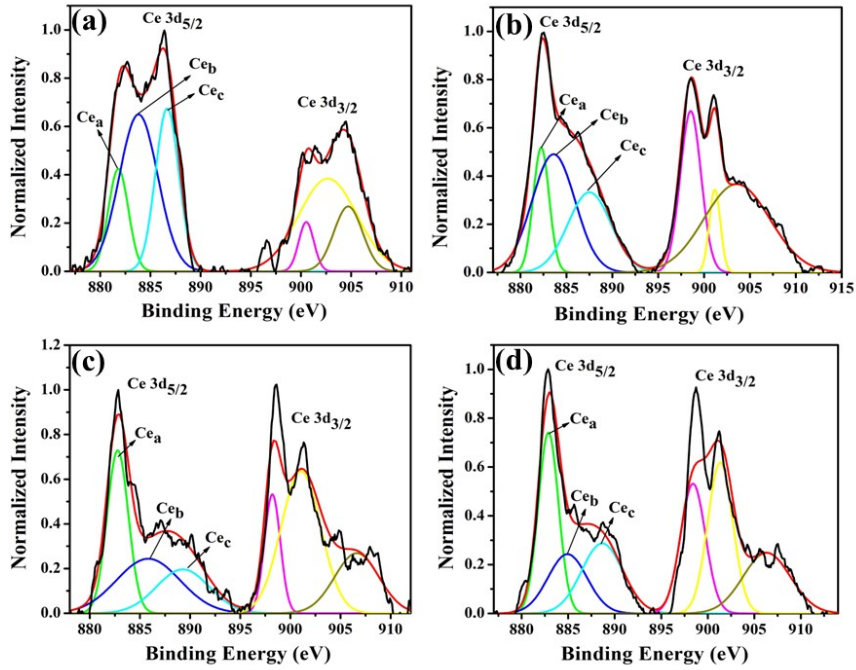

Fig. S10 XPS Ce 3d core level spectra of (a)  $NCMO_{0.00}$ , (b)  $NCMO_{0.50}$ , (c)  $NCMO_{0.78}$  and (d)  $NCMO_{1.00}$  respectively.



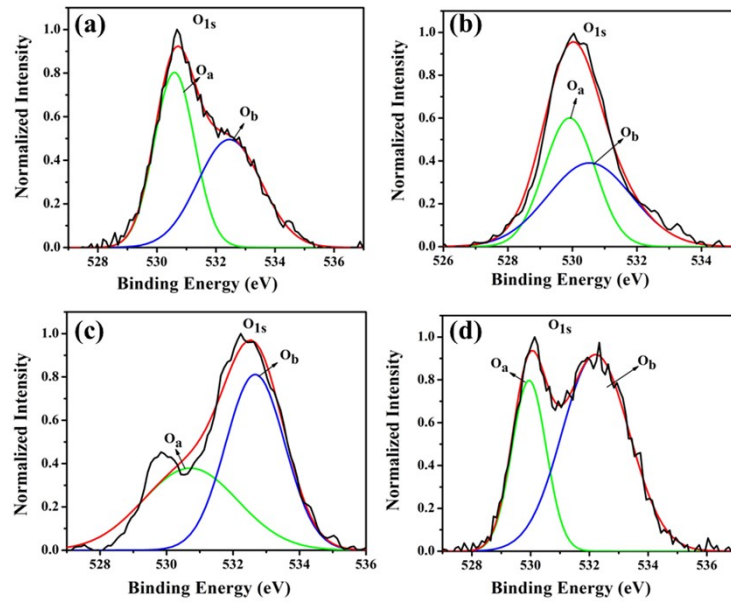

Fig. S11 XPS O1s core level spectra of (a)  $NCMO_{0.00}$ , (b)  $NCMO_{0.50}$ , (c)  $NCMO_{0.78}$  and (d)  $NCMO_{1.00}$  respectively.

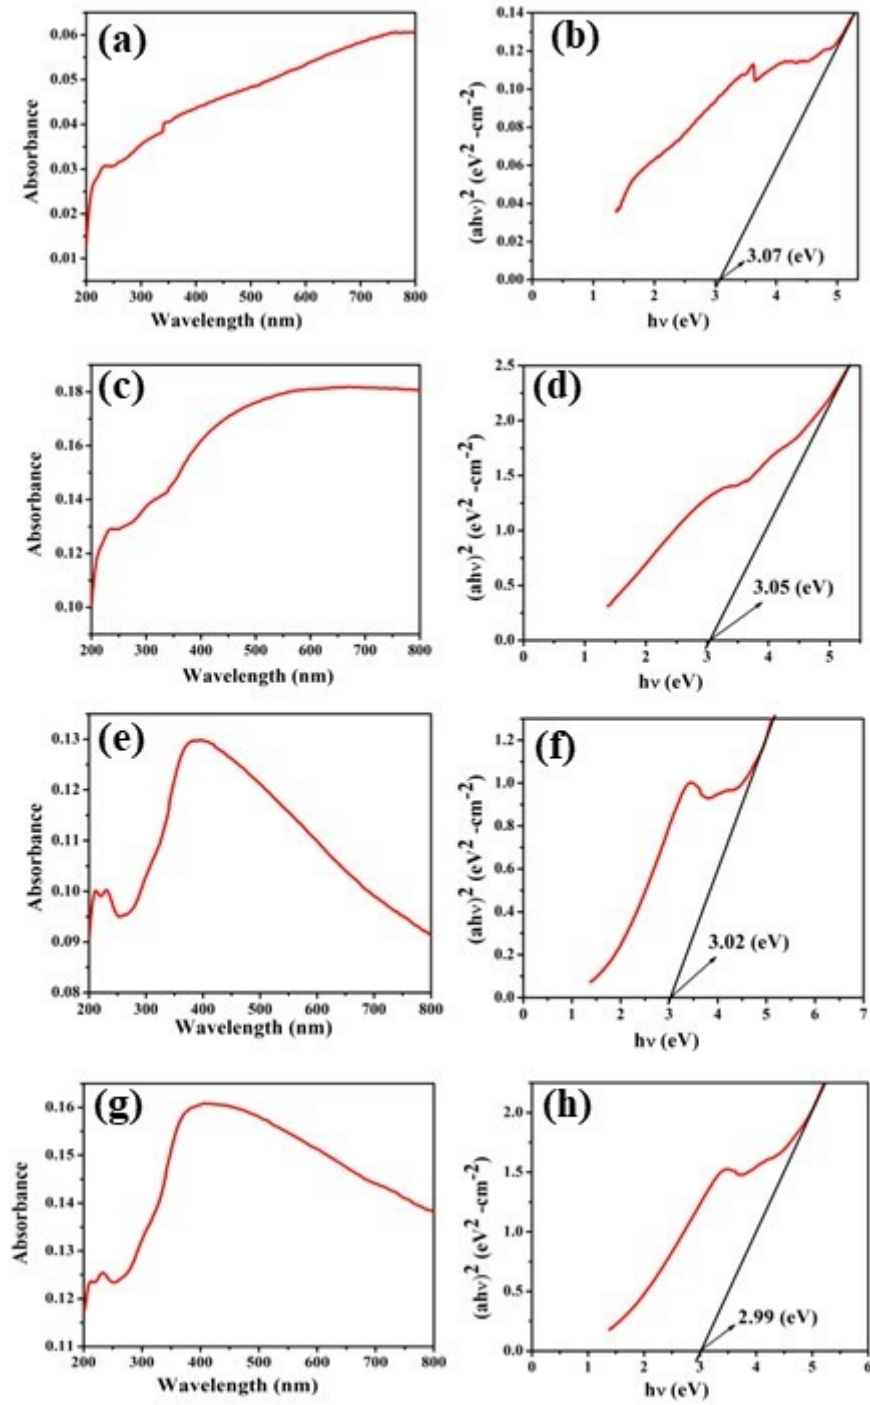

Fig. S12 UV spectra and corresponding band gap of (a, b)  $NCMO_{0.00}$ , (c, d)  $NCMO_{0.50}$ , (e, f)  $NCMO_{0.78}$  and (g, h)  $NCMO_{1.00}$  respectively.

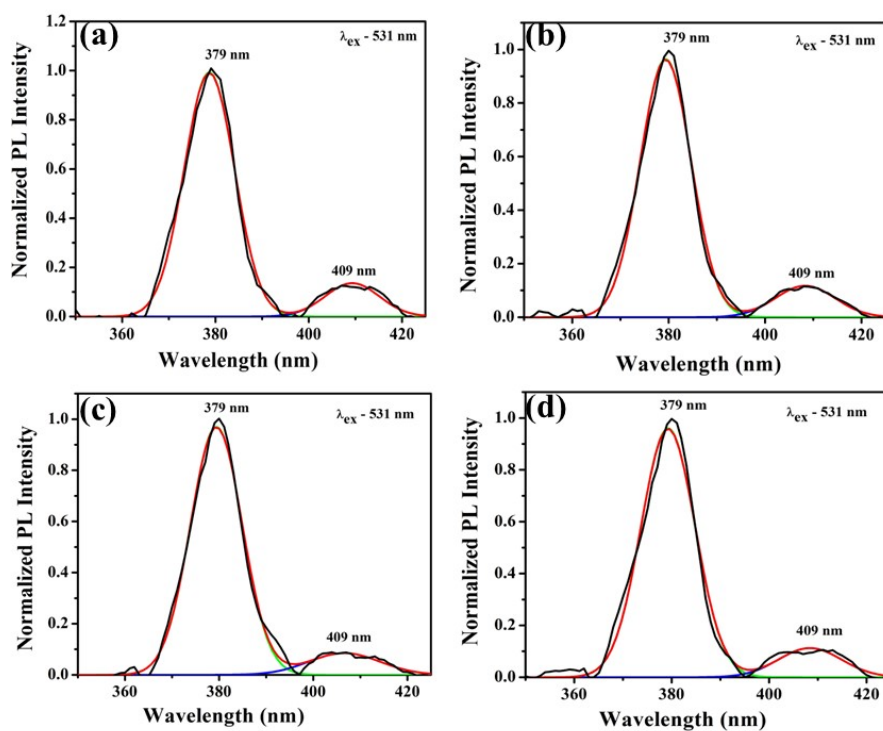

Fig. S13 PLE spectra of (a)  $NCMO_{0.00}$ , (b)  $NCMO_{0.50}$ , (c)  $NCMO_{0.78}$  and (d)  $NCMO_{1.00}$  respectively.

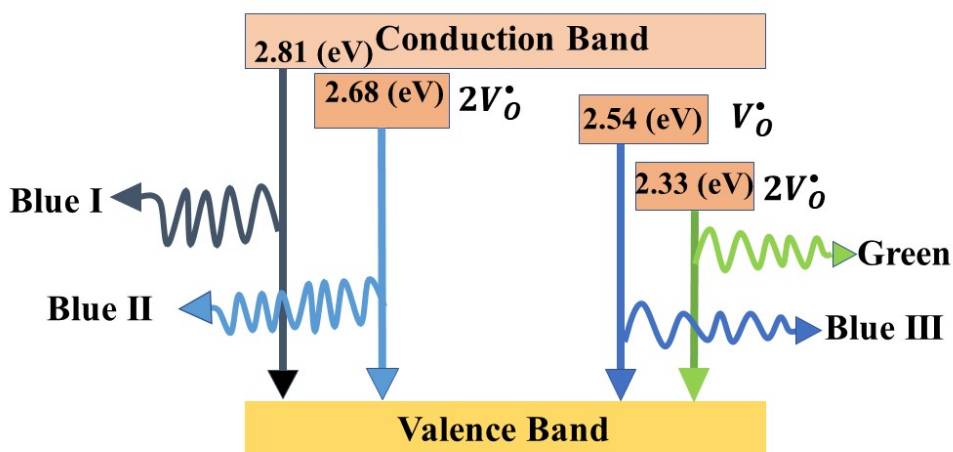

Fig. S14 Schematic representation of luminescent transitions of NCMO.

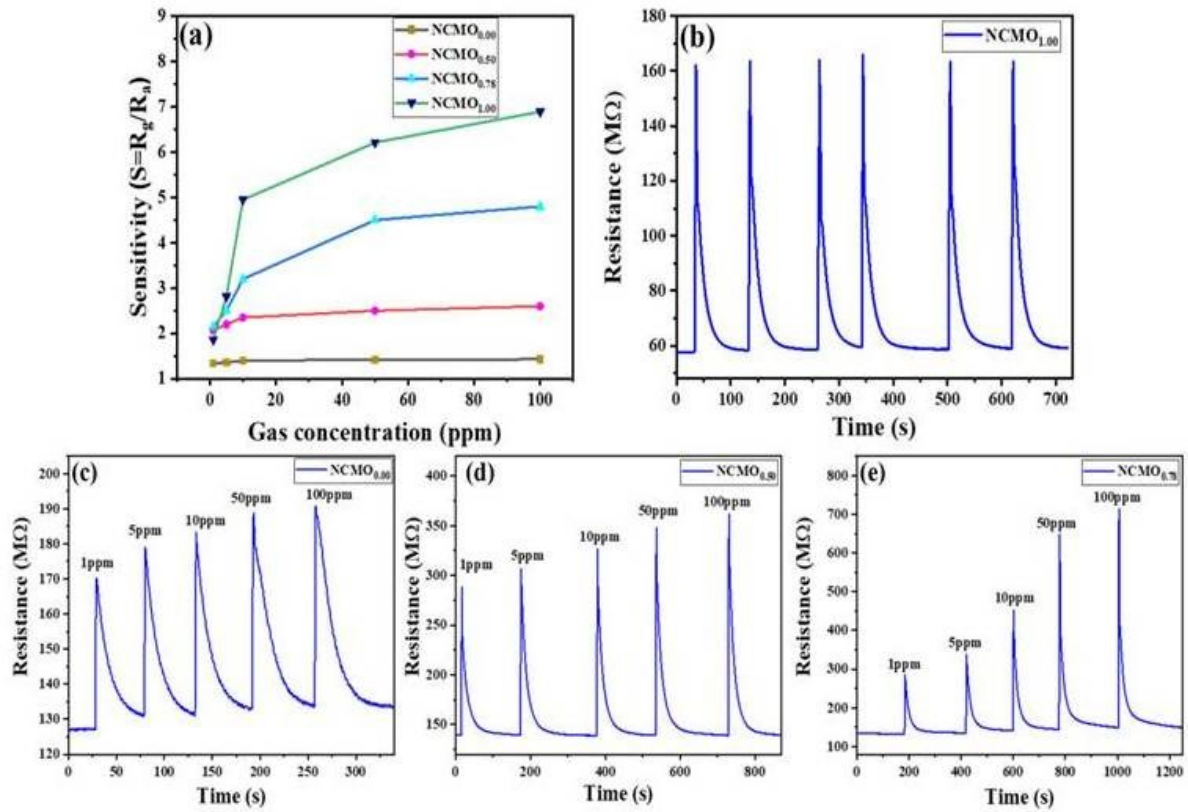

Fig. S15 (a) Sensitivity vs acetone concentration (1-100 ppm) curve for  $NCMO_{0.00}$ ,  $NCMO_{0.50}$ ,  $NCMO_{0.78}$  and  $NCMO_{1.00}$  at  $300^{\circ}C$ , (b) Cyclic response-recovery curves of  $NCMO_{1.00}$  sensor to 5 ppm acetone for six consecutive cycles of measurement at  $300^{\circ}C$ . Dynamic acetone response curve of (c)  $NCMO_{0.00}$ , (d)  $NCMO_{0.50}$  and (e)  $NCMO_{0.78}$  sensor to acetone concentration from 1 – 100 ppm at  $300^{\circ}C$ , respectively.

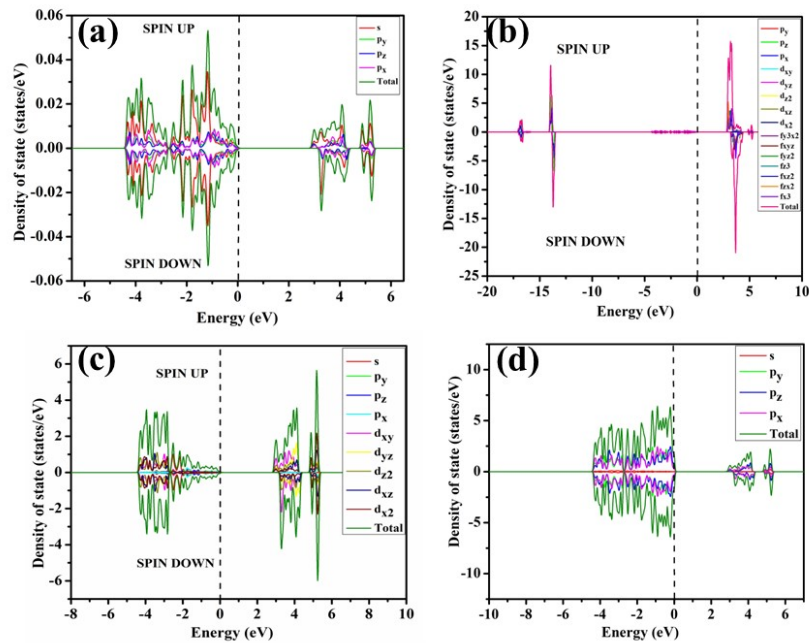

Fig. S16 PDOS of (a) Na, (b) Ce, (c) Mo and (d) O of NCMO.

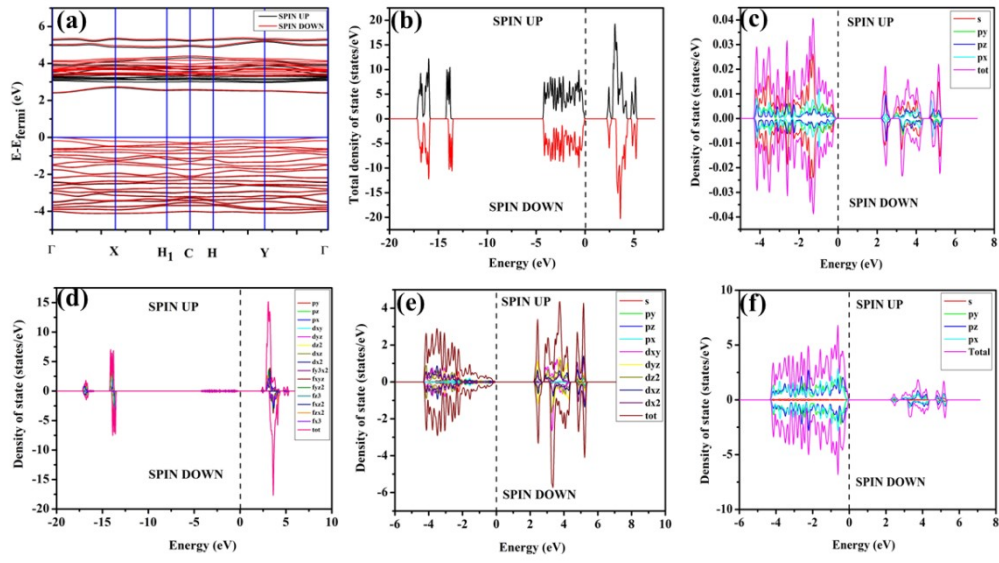

Fig. S17 (a) Band structure and (b) spin polarised TDOS and PDOS of (c) Na, (d) Ce, (e) Mo and (f) O of  $\text{NCMO} - V_{\text{O}}^{\bullet}$ .

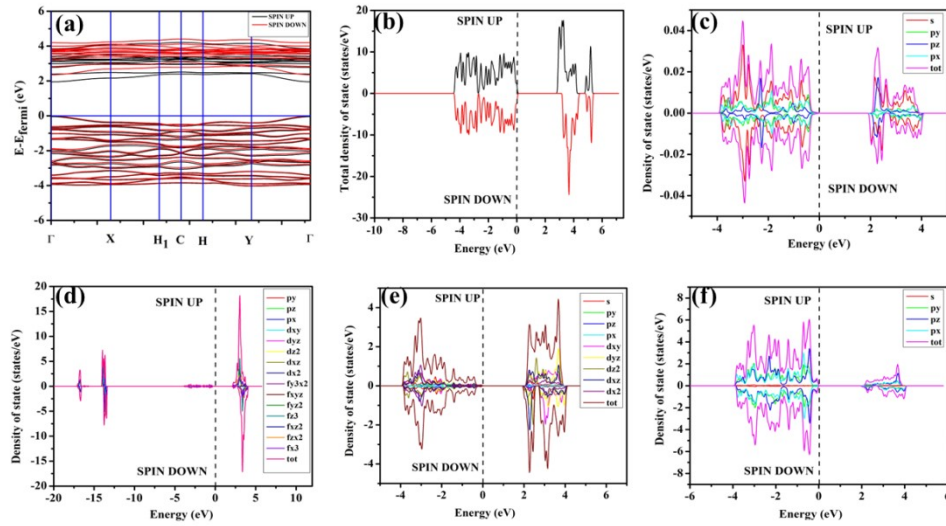

Fig. S18 (a) Band structure and (b) spin polarised TDOS and PDOS of (c) Na, (d) Ce, (e) Mo and (f) O of  $\text{NCMO} - 2V_{\text{O}}^{\bullet}$ .

### Calculation of $\varepsilon_c(1, 3 +, Ce^{3+})$

Presently, we have calculated shift of the centroid of according to eqn (1) [45].

$$\varepsilon_c(1, 3 +, Ce^{3+}) = 6.35 - E^c(1, 3 +, Ce^{3+}) \quad (1)$$

And  $\varepsilon_c(1, 3 +, Ce^{3+})$  is found to be 5.91, 5.67 and 5.43 eV for  $CeO_8$ ,  $CeO_7$  and  $CeO_6$  respectively, therefore, red shift of the 5d – 4f transition is ascribed to reduce  $\varepsilon_c(1, 3 +, Ce^{3+})$  in  $CeO_7$  and  $CeO_6$  with reference to  $CeO_8$ . In order to validate blue II emission with crystal field splitted d-orbitals or not, we have also calculated crystal field stabilization energy  $\varepsilon_{cfs}(1, 3 +, Ce^{3+})$  using eqn (2)

$$\varepsilon_{cfs}(1, 3 +, Ce^{3+}) = \beta R_{av}^{-2} \quad (2)$$

where,  $\beta = 1.35 \times 10^9 \text{ pm}^2 \text{ cm}^{-1}$  for  $Ce^{3+}$  and  $R_{av} = \frac{1}{N} \sum_{i=1}^N (R_i - 0.6\Delta R)$ ;  $R_i$  denotes individual bond lengths to the N coordinating anions in the un-relaxed lattice. We have obtained  $\varepsilon_{cfs}(1, 3 +, Ce^{3+}) \sim 2.16, 3.37$  and  $4.56$  eV for  $CeO_8, CeO_7$  and  $CeO_6$  respectively indicating that splitting of d-orbitals of  $Ce^{3+}$  gradually increases from  $CeO_8$  ( $\sim 17,500 \text{ cm}^{-1}$ ) to  $CeO_6$ . Herein, we have noticed the difference between  ${}^5D_0 - {}^2F_{5/2}$  and  ${}^5D_0 - {}^2F_{7/2}$  transitions  $\sim 2,000 \text{ cm}^{-1}$ , while blue I and blue II are differed by  $\sim 1082 \text{ cm}^{-1}$ , hence blue II emission cannot be attributed to either  ${}^5D_0 - {}^2F_{7/2}$  transition within  $CeO_8$  polyhedra or 5d orbital splitted transition. Given that  $2V_O$  gives two distinct  $\varepsilon_c(1, 3 +, Ce^{3+})$ s within  $CeO_6$  according to our DFT calculations, thus we ascribe blue II emission with other  $\varepsilon_c(1, 3 +, Ce^{3+})$  (discussed later). It will be interesting to note from Fig. 4(e) that intensities of green and blue II gradually increase from  $NCMO_{0.00}$  to  $NCMO_{1.00}$ , due to increase of  $2V_O$  i.e.  $CeO_6$  which agrees well with our FTIR, XPS results giving that  $Na_3Cit.2H_2O$  has a predominant role to tune oxygen vacancy, especially  $2V_O$ .
